# Supplementary material for: Knowledge, Attitude, and Practice of Infection Control and Waste Management among Traditional Medicine Practitioners in Bhutan, 2019: A Nationwide Cross-Sectional Survey
Source: Hindawi journal article supplement (doi:10.1155/2021/6691780), 2021-04-12
Supplement: f1 [file 6691780.f1.pdf]

## Data collection form (English)

| Q                    | Question                                                                                                                                                                                                                                                                                                 | Responses                                                                                                                                                                                                                                  |
|----------------------|----------------------------------------------------------------------------------------------------------------------------------------------------------------------------------------------------------------------------------------------------------------------------------------------------------|--------------------------------------------------------------------------------------------------------------------------------------------------------------------------------------------------------------------------------------------|
| <b>BASIC DETAILS</b> |                                                                                                                                                                                                                                                                                                          |                                                                                                                                                                                                                                            |
| G1                   | How old are you?                                                                                                                                                                                                                                                                                         | _____ years                                                                                                                                                                                                                                |
| G2                   | What is your sex?                                                                                                                                                                                                                                                                                        | <input type="checkbox"/> Male<br><input type="checkbox"/> Female                                                                                                                                                                           |
| G3                   | How many years have you been working?                                                                                                                                                                                                                                                                    | _____ years                                                                                                                                                                                                                                |
| G4                   | What is your designation?                                                                                                                                                                                                                                                                                | <input type="checkbox"/> <i>Drungtsho</i><br><input type="checkbox"/> <i>Smenpa</i>                                                                                                                                                        |
| G5                   | Which hospital do you work?                                                                                                                                                                                                                                                                              | <input type="checkbox"/> National Traditional Medicine Hospital<br><input type="checkbox"/> Regional Referral Hospital<br><input type="checkbox"/> Dzongkhag Hospital<br><input type="checkbox"/> BHU I<br><input type="checkbox"/> BHU II |
| G6                   | Do you have hand washing facilities at your hospital?                                                                                                                                                                                                                                                    |                                                                                                                                                                                                                                            |
|                      | Running water                                                                                                                                                                                                                                                                                            | <input type="checkbox"/> Yes<br><input type="checkbox"/> No                                                                                                                                                                                |
|                      | Soap                                                                                                                                                                                                                                                                                                     | <input type="checkbox"/> Yes<br><input type="checkbox"/> No                                                                                                                                                                                |
|                      | Sink / washing basin                                                                                                                                                                                                                                                                                     | <input type="checkbox"/> Yes<br><input type="checkbox"/> No                                                                                                                                                                                |
| G7                   | Was infection control taught during your training period?                                                                                                                                                                                                                                                | <input type="checkbox"/> Yes<br><input type="checkbox"/> No                                                                                                                                                                                |
| G8                   | Did you get any training or workshop on infection control after joining service?                                                                                                                                                                                                                         | <input type="checkbox"/> Yes<br><input type="checkbox"/> No                                                                                                                                                                                |
| G9                   | Did you get vaccinated for hepatitis B?                                                                                                                                                                                                                                                                  | <input type="checkbox"/> Yes<br><input type="checkbox"/> No                                                                                                                                                                                |
| <b>KNOWLEDGE</b>     |                                                                                                                                                                                                                                                                                                          |                                                                                                                                                                                                                                            |
| K1                   | In the World Health Organisation hand washing guideline, how many steps are there in hand washing?                                                                                                                                                                                                       | _____ steps                                                                                                                                                                                                                                |
| K2                   | What are the five moments? of hand hygiene? (fill in the blanks)<br><br><i>Answers:</i><br><i>before touching a patient,</i><br><i>before clean/aseptic procedures,</i><br><i>after body fluid exposure/risk,</i><br><i>after touching a patient, and</i><br><i>after touching patient surroundings.</i> | 1.<br>2.<br>3.<br>4.<br>5.                                                                                                                                                                                                                 |
| K3                   | If you are performing a blood-letting procedure, what type of gloves will you use in an ideal situation?                                                                                                                                                                                                 | <input type="checkbox"/> Sterile/surgical gloves<br><input type="checkbox"/> Clean gloves<br><input type="checkbox"/> Utility gloves                                                                                                       |
| K4                   | After performing a blood-letting procedure, where will you dispose your scalpel?                                                                                                                                                                                                                         | <input type="checkbox"/> Green bucket<br><input type="checkbox"/> Red bucket<br><input type="checkbox"/> Yellow box                                                                                                                        |
| K5                   | After performing a blood-letting procedure, where will you dispose the gauze material?                                                                                                                                                                                                                   | <input type="checkbox"/> Green bucket<br><input type="checkbox"/> Red bucket                                                                                                                                                               |

|                  |                                                                                                            |                                                                  |                  |                             |
|------------------|------------------------------------------------------------------------------------------------------------|------------------------------------------------------------------|------------------|-----------------------------|
|                  |                                                                                                            | <input type="checkbox"/> Blue bucket                             |                  |                             |
|                  |                                                                                                            | <input type="checkbox"/> Yellow box                              |                  |                             |
| K6               | After performing a blood-letting procedure, what is the first step before you dispose the blood?           | <input type="checkbox"/> Disinfect the blood                     |                  |                             |
|                  |                                                                                                            | <input type="checkbox"/> Dispose it into the pit                 |                  |                             |
|                  |                                                                                                            | <input type="checkbox"/> Wash it off with water                  |                  |                             |
|                  |                                                                                                            | <input type="checkbox"/> Dispose it directly into the toilet pot |                  |                             |
| K7               | Which of the following steps in traditional medicine can spread microorganisms?                            | <input type="checkbox"/> Herbal bath                             |                  |                             |
|                  |                                                                                                            | <input type="checkbox"/> Blood letting                           |                  |                             |
|                  |                                                                                                            | <input type="checkbox"/> Dispensing medicines                    |                  |                             |
|                  |                                                                                                            | <input type="checkbox"/> Cupping                                 |                  |                             |
|                  |                                                                                                            | <input type="checkbox"/> <i>Serkhap</i>                          |                  |                             |
| K8               | Which of the following are NOT personal protective equipment?                                              | <input type="checkbox"/> Mask                                    |                  |                             |
|                  |                                                                                                            | <input type="checkbox"/> Patient register                        |                  |                             |
|                  |                                                                                                            | <input type="checkbox"/> Medicines                               |                  |                             |
|                  |                                                                                                            | <input type="checkbox"/> Gloves                                  |                  |                             |
| <b>ATTITUDES</b> |                                                                                                            |                                                                  |                  |                             |
|                  |                                                                                                            | <i>Not interested</i>                                            | <i>Not sure</i>  | <i>Very much interested</i> |
| A1               | According to <i>smen-pai gyu-dru</i> , how interested are you in learning about infection control?         |                                                                  |                  |                             |
| A2               | Are you interested to adopt the national guideline on infection control at your traditional medicine unit? |                                                                  |                  |                             |
| A3               | If there is a training on infection control, are you interested to participate in it?                      |                                                                  |                  |                             |
| <b>PRACTICES</b> |                                                                                                            |                                                                  |                  |                             |
|                  |                                                                                                            | <i>Never</i>                                                     | <i>Sometimes</i> | <i>Always</i>               |
| P1               | How often do you wear apron at your workplace?                                                             |                                                                  |                  |                             |
| P2               | Before you read the pulse of a patient, how often do you wash your hands?                                  |                                                                  |                  |                             |
| P3               | Before performing therapies, how often do you wash your hands?                                             |                                                                  |                  |                             |
| P4               | How often do you wash hands after performing <i>num-tshug</i> ?                                            |                                                                  |                  |                             |
| P5               | How often do you dispose the scalpels in the correct dustbin?                                              |                                                                  |                  |                             |
| P6               | Do you use a mask when you are suffering from common cold?                                                 |                                                                  |                  |                             |
| P7               | Do you use gloves when you dispense medicines?                                                             |                                                                  |                  |                             |
| P8               | Do you disinfect the instrument set used for cupping?                                                      |                                                                  |                  |                             |
| P9               | Do you examine patients in places other than your chamber?                                                 |                                                                  |                  |                             |
| P10              | Do you disinfect the floor of your traditional medicine unit?                                              |                                                                  |                  |                             |

Data collection form (Dzongkha)

འབྲུག་ལུ་ བང་པའི་རྩུང་འཚོ་དང་སྐྱེན་པ་ཚུ་གི་ གཉན་ནད་བཀག་འཛིན་གྱི་ཡོན་ཏན་ བསམ་སྒོ་ ལག་ལེན་བརྟག་ཞིབ།

འདི་ རང་གིས་བཀང་གི་ནི་དྲི་བ་ཡིན། དགོས་མཁོ་དང་བསྐྱེད་ཏེ་ ལན་ཚུ་ ཉགས་དང་ ཡང་ན་ ས་སྤྱོད་བསྐྱབ་གནང་།

| Q  | དྲི་བ།                                                             | གདམ་ཁ།                                                                                                                                                                                                                                                                                   |
|----|--------------------------------------------------------------------|------------------------------------------------------------------------------------------------------------------------------------------------------------------------------------------------------------------------------------------------------------------------------------------|
|    | གཞི་རྟེན་ལ་གསལ།                                                    |                                                                                                                                                                                                                                                                                          |
| G1 | ཚོད་ སྐྱེ་ལོ་ག་དེམ་ཅིག་སྟོ།                                        | ལོ་_____ ཡིན།(ཨང་ཡིག་བརྩུག་གནང་།) )                                                                                                                                                                                                                                                      |
| G2 | ཕོ་མོའི་དབྱེ་བ་ག་ཅི་སྟོ།                                           | <input type="checkbox"/> ཕོ།<br><input type="checkbox"/> མོ།                                                                                                                                                                                                                             |
| G3 | ཞི་གཡོག་ནང་ལུ་ ལོ་ག་དེ་ཅིག་ཡར་སོད།                                 | ལོ་_____ ཡར་སོད།                                                                                                                                                                                                                                                                         |
| G4 | སྐྱེན་ཁང་ནང་ལུ་ ཕྱག་འགན་ག་ཅི་སྟོ།                                  | <input type="checkbox"/> རྩུང་འཚོ།<br><input type="checkbox"/> སྐྱེན་པ།                                                                                                                                                                                                                  |
| G5 | སྐྱེན་ཁང་ དབྱེ་རིམ་ ག་ཅི་ནང་ཕྱག་ལུ་གནང་མ་སྟོ།                      | <input type="checkbox"/> རྒྱལ་ཡོངས་ནང་པའི་སྐྱེན་ཁང་།<br><input type="checkbox"/> ལུང་ཕྱོགས་གཙོ་བསྟེན་སྐྱེན་ཁང་།<br><input type="checkbox"/> རྫོང་ཁག་སྐྱེན་ཁང་།<br><input type="checkbox"/> གཞི་རྟེན་སྐྱེན་ཁང་ ལྷེ་རིམ་ ༡ པ།<br><input type="checkbox"/> གཞི་རྟེན་སྐྱེན་ཁང་ ལྷེ་རིམ་ ༢ པ། |
| G6 | ཚོད་གྱི་སྐྱེན་ཁང་ནང་ ལག་པ་འཁྲུ་ནི་གི་མཐུན་རྐྱེན་ཡོད་ག།             |                                                                                                                                                                                                                                                                                          |
|    | རྒྱ།                                                               | <input type="checkbox"/> ཡོད།<br><input type="checkbox"/> མེད།                                                                                                                                                                                                                           |
|    | གྲང་ལེབ།                                                           | <input type="checkbox"/> ཡོད།<br><input type="checkbox"/> མེད།                                                                                                                                                                                                                           |
|    | རྒྱ་གཞོང་།                                                         | <input type="checkbox"/> ཡོད།<br><input type="checkbox"/> མེད།                                                                                                                                                                                                                           |
| G7 | སྟོབ་སྦྱོང་འབད་བའི་སྐབས་ གཉན་ནད་བཀག་འཛིན་ ལྟུབ་ཅི་ག།               | <input type="checkbox"/> ཡོད།<br><input type="checkbox"/> མེད།                                                                                                                                                                                                                           |
| G8 | ཞི་གཡོག་ནང་འཚུལ་ཞིན་མ་ལས་ གཉན་ནད་བཀག་འཛིན་གྱི་སྤྱོད་བརྟན་ཐོབ་ཅི་ག། | <input type="checkbox"/> ཡོད།<br><input type="checkbox"/> མེད།                                                                                                                                                                                                                           |

|                |                                                                                    |                                                                                                                                                                                                                          |
|----------------|------------------------------------------------------------------------------------|--------------------------------------------------------------------------------------------------------------------------------------------------------------------------------------------------------------------------|
| G9             | མཚན་ནད་ ཉེ་པ་གི་གྲིས་ཅིག་ ལྷན་ཁང་ཐོབ་ཅི་ག།                                         | <input type="checkbox"/> ཡོད།<br><input type="checkbox"/> མེད།                                                                                                                                                           |
| <b>ཡོན་ཏན།</b> |                                                                                    |                                                                                                                                                                                                                          |
| K1             | འཇོན་གྲིང་གསོ་བའི་ཚོགས་སྡེ་གི་ལམ་སྟོན་ནང་ལུ་ ལག་པ་འལུ་<br>ནི་ དེམ་པ་ ག་དེ་ཅིག་ཡོད། | དེམ་པ་ _____ ཡོད།                                                                                                                                                                                                        |
| K2             | ལྷན་ཁང་ནང་ ལག་པ་ ལམ་ར་འལུ་དགོས་སྟོ།                                                | ༡<br>༢<br>༣<br>༤<br>༥                                                                                                                                                                                                    |
| K3             | གཏར་རྒྱུ་བའི་སྐབས་ ལག་ཤུབས་ག་ཅི་བརྩམ་ ལག་ལེན་<br>འཐབ་སྟོ།                          | <input type="checkbox"/> འག་བཅོས་ལག་ཤུབས།<br><input type="checkbox"/> ལག་ཤུབས་གཙང་ཉོག་ཉོ།<br><input type="checkbox"/> འབེད་སྟོད་ལག་ཤུབས།                                                                                 |
| K4             | ལྷག་ གཏར་བའི་ཤུལ་ལུ་ གཏར་གའི་ཆ་བྱད་ ག་ཉེ་ལུ་བཀོམ་<br>སྟོ།                          | <input type="checkbox"/> ལྷག་སྟིགས་སྟོམ་ལུང་ལ།<br><input type="checkbox"/> ལྷག་སྟིགས་སྟོམ་དམར་པོ།<br><input type="checkbox"/> ལྷག་སྟིགས་སྟོམ་མེར་པོ།                                                                     |
| K5             | ལྷག་གཏར་བའི་ཤུལ་ལུ་ མ་རས་ ག་ཉེ་བཀོམ་སྟོ།                                           | <input type="checkbox"/> ལྷག་སྟིགས་སྟོམ་ལུང་ལ།<br><input type="checkbox"/> ལྷག་སྟིགས་སྟོམ་དམར་པོ།<br><input type="checkbox"/> ལྷག་སྟིགས་སྟོམ་ཉོན་མ།<br><input type="checkbox"/> ལྷག་སྟིགས་སྟོམ་མེར་པོ།                   |
| K6             | ལྷག་ གཏར་བའི་ཤུལ་ལུ་ ལྷག་དེ་ མ་བཀོ་བའི་ཉེ་མ་ ག་ཅི་<br>འབདམ་སྟོ།                    | <input type="checkbox"/> ལྷག་ གཉན་སྟིན་སེལ་ནི།<br><input type="checkbox"/> ལྷག་སྟིགས་རྒྱགས་སར་བཀོ་ནི།<br><input type="checkbox"/> རྩེ་ བཤལ་བཀོ་ནི།<br><input type="checkbox"/> རྩེ་བཤལ་ནང་བཀོ་ནི།                        |
| K7             | གཉན་ནད་རྩེ་ འོག་ལུ་ཡོད་མི་ ག་ཅི་ལས་འབྲུམ་སྟོ།                                      | <input type="checkbox"/> རྩེ་ལུ་མས་སྤང་མ་ད།<br><input type="checkbox"/> ལྷག་གཏར་མ་ད།<br><input type="checkbox"/> ལྷན་སྟོད་པ་ད།<br><input type="checkbox"/> མི་འབྲུམ་རྒྱུ་ད།<br><input type="checkbox"/> ག་སེར་ལབ་རྒྱུ་ད། |

|                 |                                                                                          |                                                                                                                                                  |             |                    |
|-----------------|------------------------------------------------------------------------------------------|--------------------------------------------------------------------------------------------------------------------------------------------------|-------------|--------------------|
| K8              | འོག་ལུ་ཡོད་མི་ཚུ་ལས་ ག་དེ་ རང་སྐྱུང་ཅ་ཆས་ མེན་པས།                                        | <input type="checkbox"/> ཁ་རས།<br><input type="checkbox"/> ནད་པའི་ཐོ་དེབ།<br><input type="checkbox"/> སྐྱེ།<br><input type="checkbox"/> ལག་ཤུབས། |             |                    |
| <b>བསམ་གློ།</b> |                                                                                          |                                                                                                                                                  |             |                    |
|                 |                                                                                          | སྒྲོ་བ་མེད།                                                                                                                                      | ཐེ་ཚོམ་ནད།  | དང་འདོད་སྐྱོམ་ཡོད། |
| A1              | ཁྱོད་ སྐྱེན་པའི་རྒྱ་རྒྱུག་དང་འཁྲུལ་ གཉན་ནད་བཀག་འཛིན་<br>འབད་ནི་ དང་འདོད་ཡོད་ག།           |                                                                                                                                                  |             |                    |
| A2              | ཁྱོད་ རྒྱལ་ཡོངས་གཉན་ནད་བཀག་འཛིན་ལམ་སྟོན་དེ་ བསྟར་<br>སྤྱད་འབད་ནི་ དང་འདོད་ཡོད་ག།         |                                                                                                                                                  |             |                    |
| A3              | གཉན་ནད་བཀག་འཛིན་གྱི་སྤྱིང་བརྒྱུད་ཡོད་པ་ཅིན་ ཁྱོད་ བཅའ་<br>མར་གཏོགས་ནི་གི་ དང་འདོད་ཡོད་ག། |                                                                                                                                                  |             |                    |
| <b>ལག་ལེན།</b>  |                                                                                          |                                                                                                                                                  |             |                    |
|                 |                                                                                          | ཅུ་ལས་མེད།                                                                                                                                       | རེ་ཚོ་སྐབས། | རྟག་བྱ་ར།          |
| P1              | ཁྱོད་ སྐྱེན་ཁང་ནང་ལུ་ སྐྱིག་གོ་རྒྱུན་ནི་ཡོད་ག།                                           |                                                                                                                                                  |             |                    |
| P2              | ཅུ་མ་བཟུ་བའི་རྟེ་མ་ ལག་པ་འཁྱུ་ནི་ཡོད་ག།                                                  |                                                                                                                                                  |             |                    |
| P3              | དཔུང་ཚུ་མ་འབད་བའི་རྟེ་མ་ ལག་པ་འཁྱུ་ནི་ཡོད་ག།                                             |                                                                                                                                                  |             |                    |
| P4              | སྐྱེ་ཚུ་གས་རྒྱབ་ཚར་བའི་ཤུལ་ལུ་ ལག་པ་འཁྱུ་ནི་ཡོད་ག།                                       |                                                                                                                                                  |             |                    |
| P5              | གཏར་རྒྱབ་པའི་ཤུལ་ལུ་ གཏར་གའི་ཆ་བྱད་ ལྷག་སྐྱིགས་སྐྱོམ་<br>ནད་ བཀོ་ནི་ཡོད་ག།               |                                                                                                                                                  |             |                    |
| P6              | ཁྱོད་ ཚ་རིམས་ཐོབ་ད་ ཁ་རས་ལག་ལེན་འཐབ་ནི་ཡོད་ག།                                            |                                                                                                                                                  |             |                    |
| P7              | ཁྱོད་ སྐྱེན་སྒྲོད་པ་ད་ ལག་ཤུབས་བཅུག་ནི་ཡོད་ག།                                            |                                                                                                                                                  |             |                    |
| P8              | མེ་འབུམ་རྒྱབ་ཚར་བའི་ཤུལ་ལུ་ ཆ་བྱད་ཚུ་ གཉན་སྐྱེན་སེལ་ནི་<br>ཡོད་ག།                        |                                                                                                                                                  |             |                    |
| P9              | ནད་པ་ཚུ་ སྐྱེན་ཁང་གི་ཁང་མིག་གི་ཕྱི་ཁར་བཟུ་ནི་ཡོད་ག།                                      |                                                                                                                                                  |             |                    |
| P10             | ཁྱོད་ཀྱིས་ སྐྱེན་ཁང་དེ་ ཚུ་སྐྱེན་སྐྱུག་སྤེལ་འཁྱུ་ནི་ཡོད་ག།                               |                                                                                                                                                  |             |                    |
